# Supplementary material for: Influence of Different Capping Agents on the Structural, Optical, and Photocatalytic Degradation Efficiency of Magnetite (Fe3O4) Nanoparticles
Source: MDPI journal article supplement (doi:10.3390/nano13142067), 2023-07-14
Supplement: s1 [file s1]

# Influence of different capping agents on structural, optical, and photocatalytic properties of iron oxide nanoparticles

Thandi B. Mbuyazi and Peter A. Ajibade\*

School of Chemistry and Physics, University of KwaZulu-Natal, Private Bag X01, Scottsville, Pietermaritzburg 3209, South Africa

\*Correspondence: [ajibadep@ukzn.ac.za](mailto:ajibadep@ukzn.ac.za)

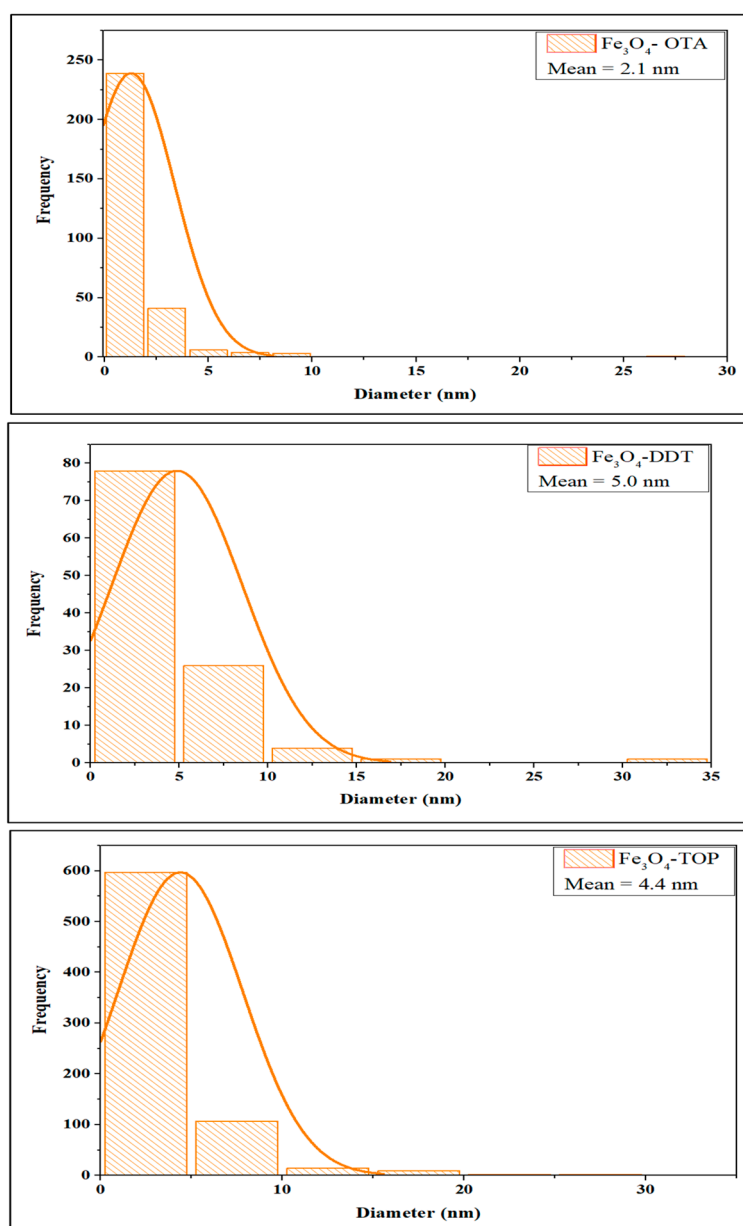

Figure S1. Size distribution histograms of OTA, DDT and TOP-capped iron oxide nanoparticles.

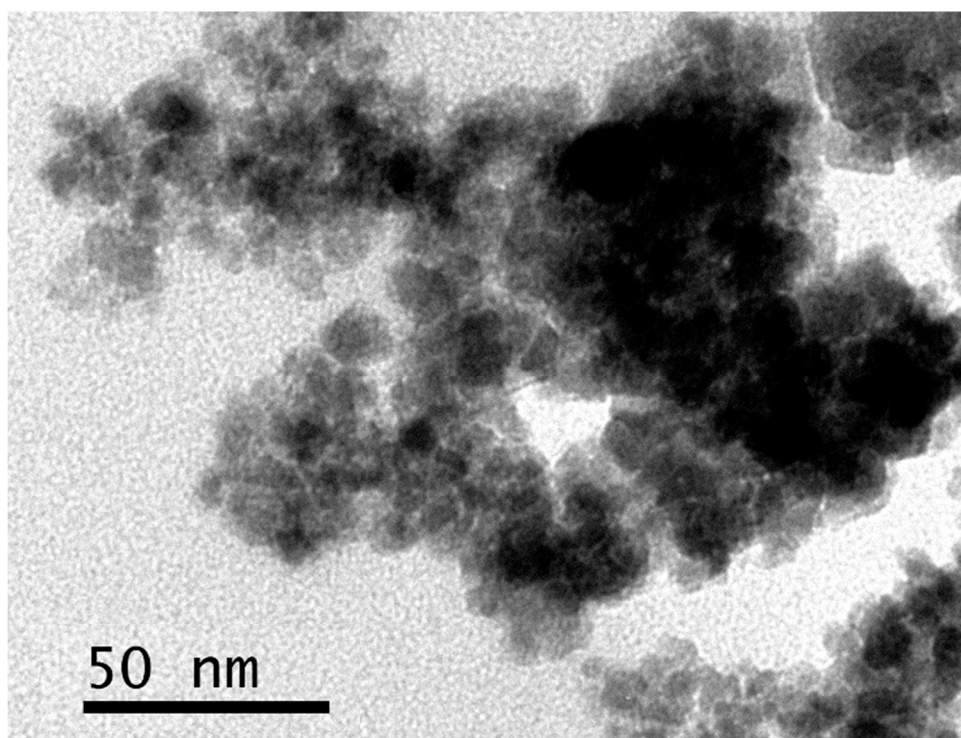

**Figure S2.** TEM image of uncapped iron oxide nanoparticles.

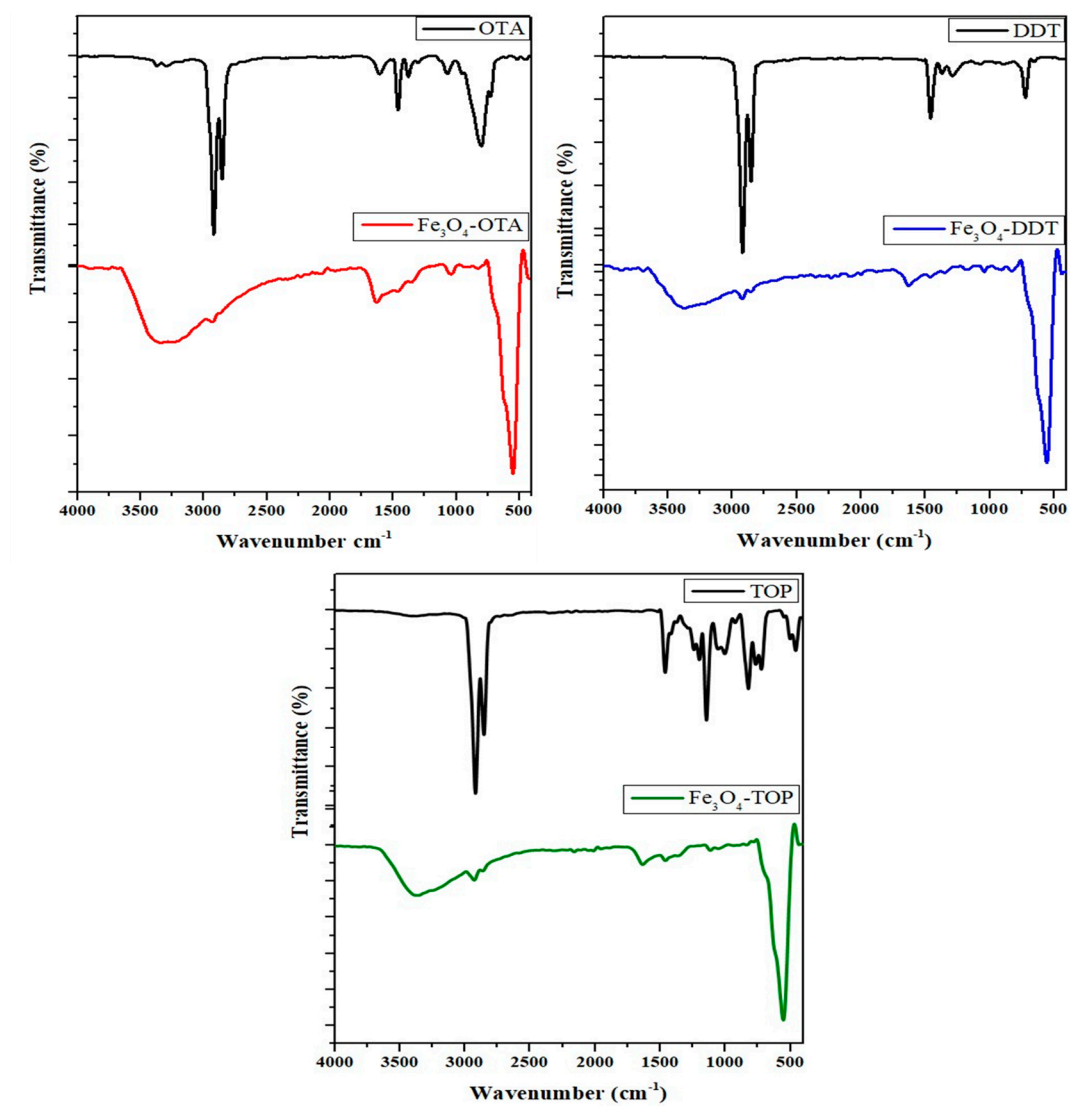

**Figure S3.** FTIR spectra overlay of octylamine, 1-dodecanethiol and tri-n-octylphosphine capped iron oxide nanoparticles.

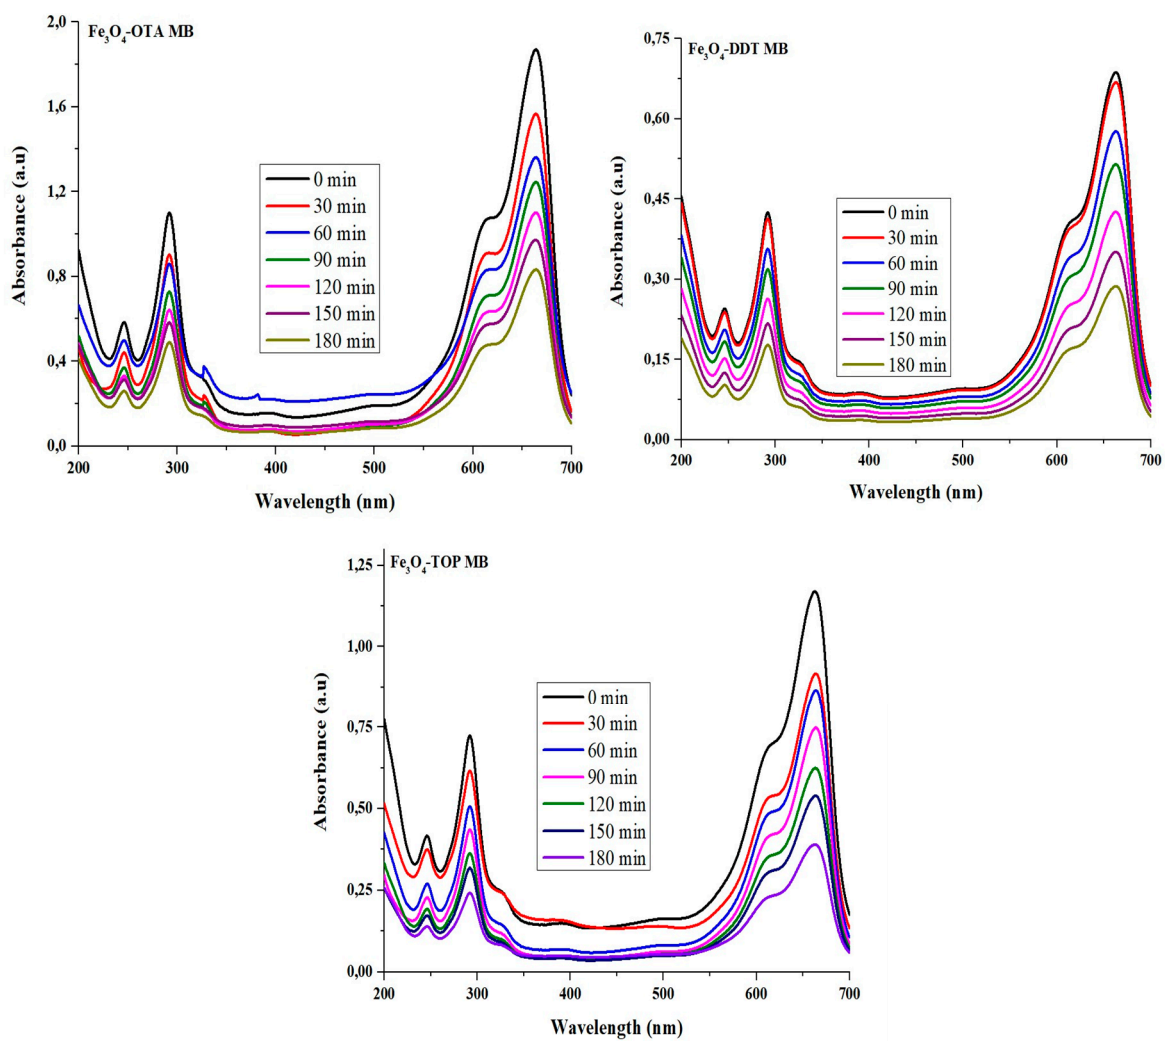

**Figure S4.** Absorption spectra of methylene blue (MB) over (a)  $\text{Fe}_3\text{O}_4$ -OTA, (b)  $\text{Fe}_3\text{O}_4$ -DDT and (c)  $\text{Fe}_3\text{O}_4$ -TOP nanoparticles

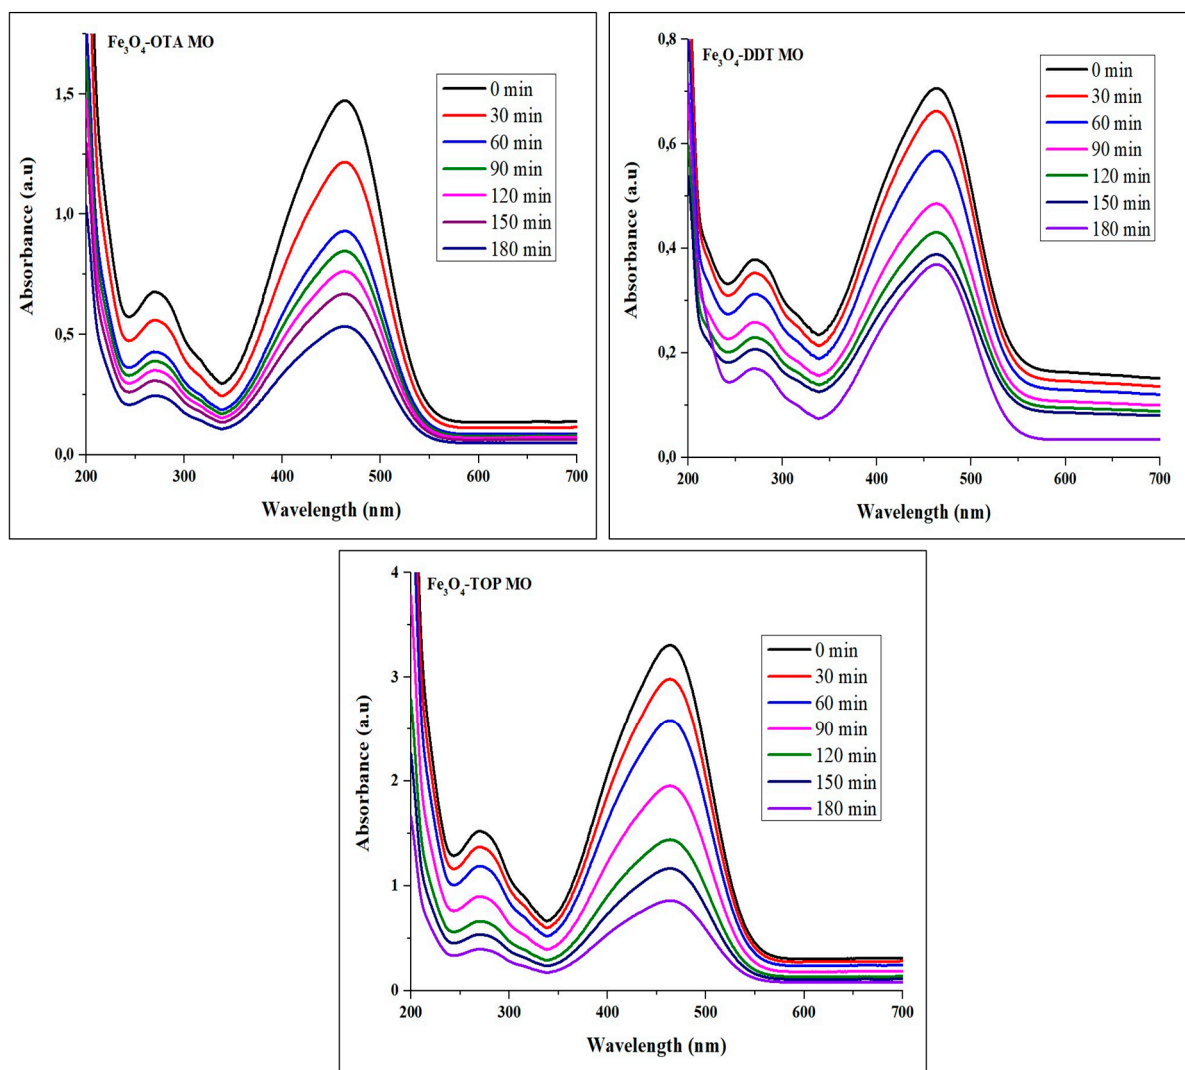

**Figure S5.** Absorption spectra of methyl orange (MO) over (a)  $\text{Fe}_3\text{O}_4$ -OTA, (b)  $\text{Fe}_3\text{O}_4$ -DDT and (c)  $\text{Fe}_3\text{O}_4$ -TOP nanoparticles

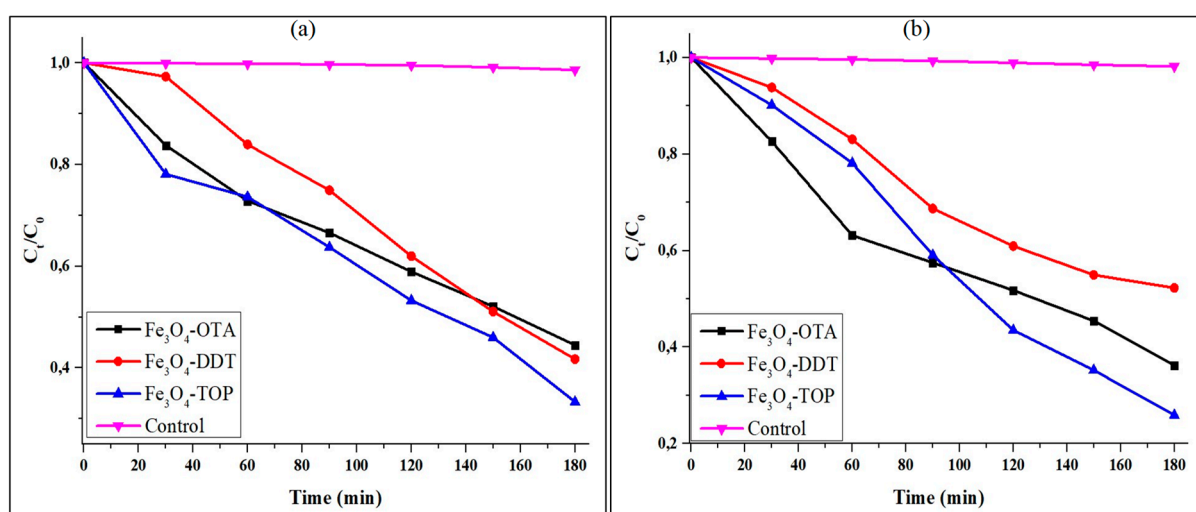

**Figure S6.** (a) MB and (b) MO  $C_t/C_0$  versus irradiation time plots.

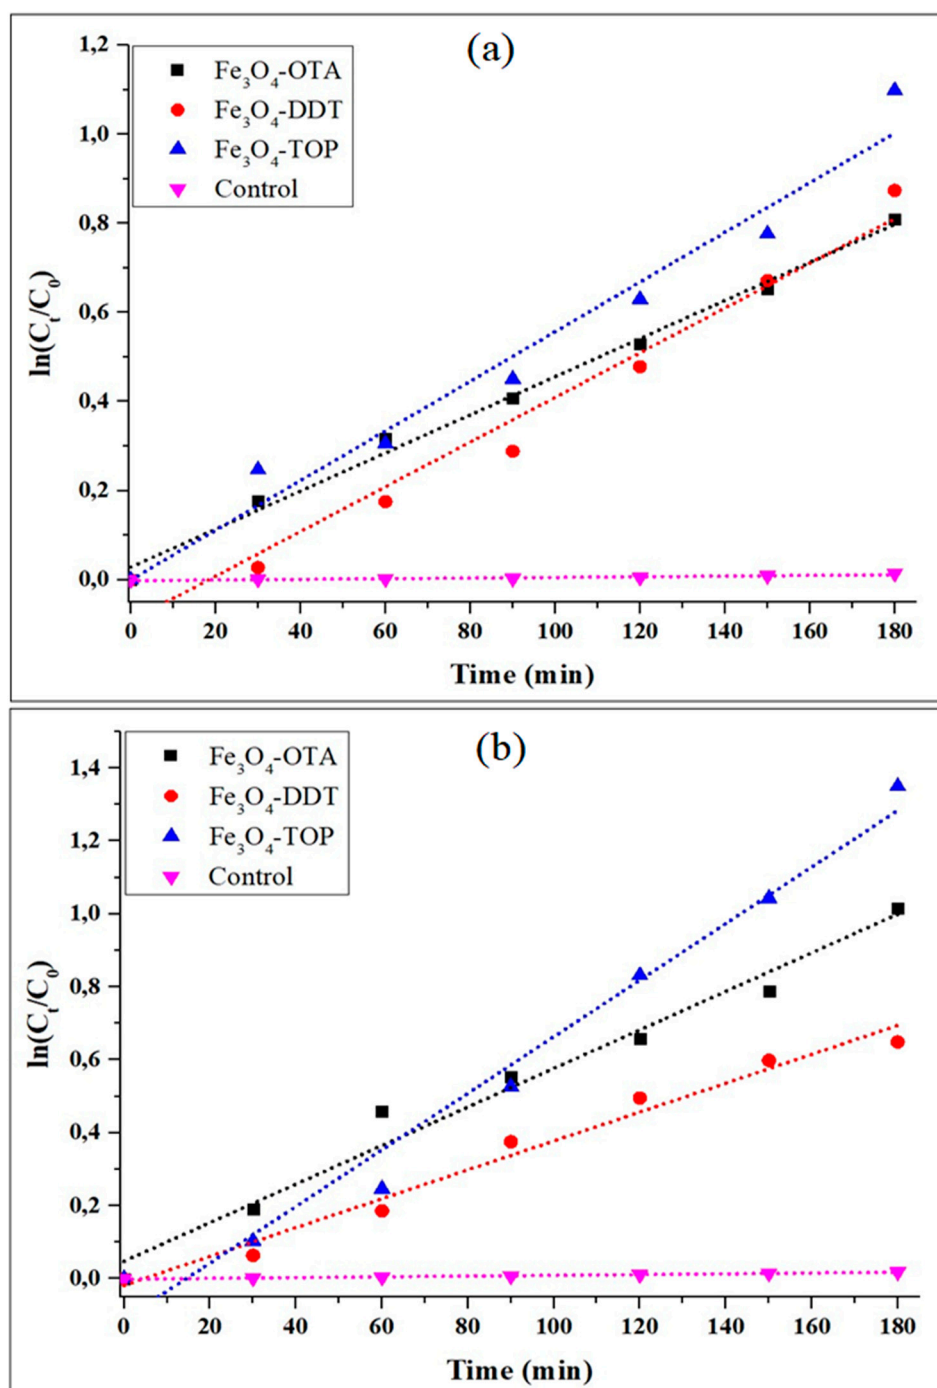

**Figure S7.** Methylene blue (a) and methyl orange (b) photocatalytic degradation kinetics using iron oxide nanoparticles as photocatalysts.

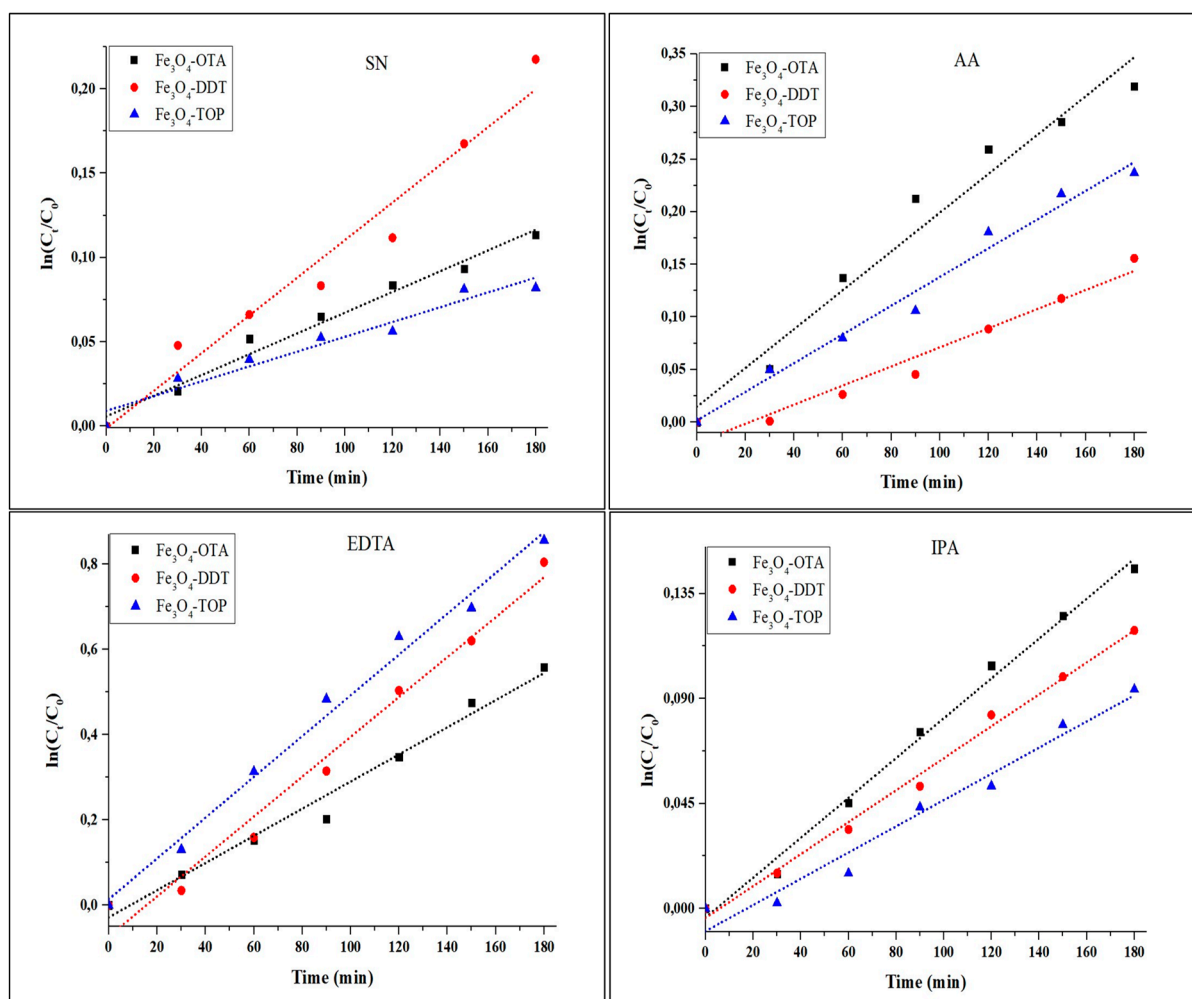

**Figure S8.** Photodegradation kinetics plots of MB by iron oxide nanoparticles in the presence of scavengers

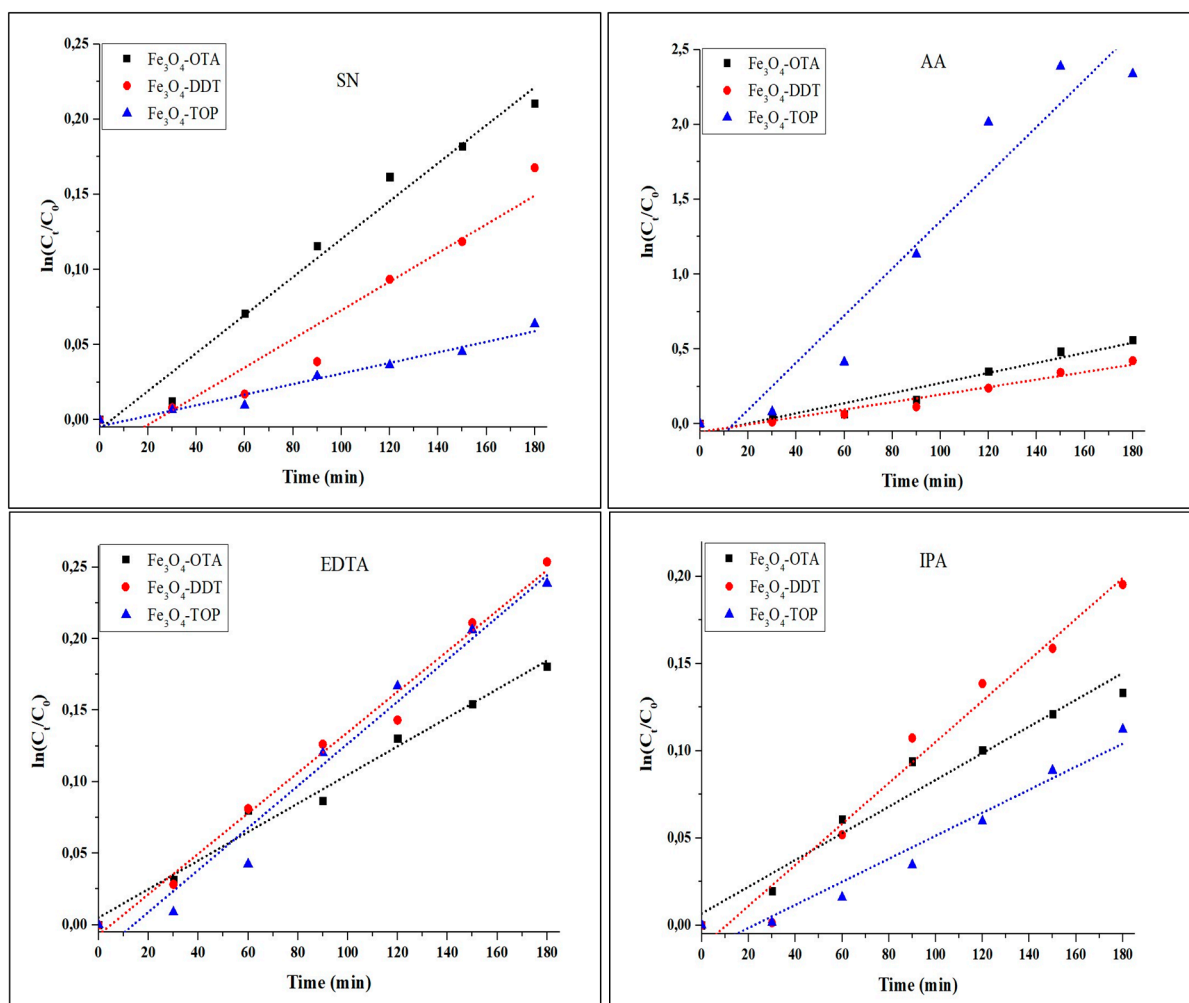

**Figure S9.** Photodegradation kinetics plots of MO by iron oxide nanoparticles in the presence of scavengers
